# Supplementary material
Source: Atypon-hosted journal article supplement (https://static.yanyin.tech/literature/current_protocol/10.1002/cpz1.368/attachments/downloadSupplement)
Supplement: downloadSupplement [file downloadSupplement]

## Sheet: MIFlowCytEV
Framework Criteria	What to report	Please complete each criterion
1.1 Preanalytical variables conforming to MISEV guidelines.	Preanalytical variables relating to EV sample including source, collection, isolation, storage, and any others relevant and available in the performed study.	We produced virus by cell transfection, by harvesting the supernatant of an infected cell population and infected cell clone. Viruses were stored at 4 oC degrees. No further manipulation was applied to the viruses.
1.2 Experimental design according to MIFlowCyt guidelines.	EV-FC manuscripts should provide a brief description of the experimental aim, keywords, and variables for the performed FC experiment(s) using MIFlowCyt checklist criteria: 1.1, 1.2, and 1.3, respectively. Template found at www.evflowcytometry.org.	Aim of this manuscript was provide to comprehensive overview of procedures used to stain, detect and quantify viral and host-derived proteins located on the surface of retroviruses. These outlined techniques can be applied for the rapid phenotypic characterization of retroviruses and other enveloped viruses at the single particle level through the direct staining of viruses collected from the sup…
2.1 Sample staining details	State any steps relating to the staining of samples. Along with the method used for staining, provide relevant reagent descriptions as listed in MIFlowCyt guidelines (Section 2.4 Fluorescence Reagent(s) Descriptions).	Virus containing supernatants were stained with anti-GFP monoclonal antibody. Methods for viral staining and optimization are described in Basic protol 3 and 4.
2.2 Sample washing details	State any steps relating to the washing of samples.	Virus containing supernatant was not washed
2.3 Sample dilution details	All methods and steps relating to sample dilution.	All sample dilution was described in Basic protocol 2-3. Samples were serially diluted in order to evaluate single particle detection efficiency and coincidence risk. Virus concentration measurements were also evaluated by serial dilution.
3.1 Buffer alone controls.	State whether a buffer-only control was analyzed at the same settings and during the same experiment as the samples of interest. If utilized it is recommended that all samples be recorded for a consistent set period of time e.g. 5 minutes, rather than stopping analysis at a set recorded event count e.g. 100,000 events. This allows comparisons of total particle counts between controls and samples.	Buffer alone (PBS) was run alongside supernatant collected from uninfected cells. All controls were run at the same acquisition settings ( 10 uL for 60 seconds).
3.2 Buffer with reagent controls.	State whether a buffer with reagent control was analyzed at the same settings, same concentrations, and during the same experiment as the samples of interest. If used state what the results were.	All controls were run at the same acquisition settings ( 10 uL for 60 seconds). Buffer and reagent, supernatant and reagent, and wild type and reagent were all labelled and run simultenously with stained MLVsfGFP.
3.3 Unstained controls.	State whether unstained control samples were analyzed at the same settings and during the same experiment as stained samples. If used, state what the results were, preferably in standard units.	All unstained controls (PBS, supernatant from uninfected cells, MLV and MLVsfGFP) were analyzed at the same acquisition settings ( 10 uL for 60 seconds) during the same session.
3.4 Isotype controls.	The use of isotype controls is applicable to immunofluorescence labelling only. State whether isotype controls were analyzed at the same settings and during the same experiment as stained samples. If utilized, state which antibody they are matched to, the concentration used, and what the results were (Section 4.2, 4.3, 4.4). Due to conjugation differences between manufacturers if should be stated…	Materials were described in Basic Protocol 4.
3.5 Single-stained controls.	State whether single-stained controls were included. If used state whether the single-stained controls were recorded using the same settings, dilutions, and during the same experiment as stained samples and state what the results were, preferably in standard units (Section 4.2, 4.3, 4.4).	Only single staining were evaluated in this manuscript.
3.6 Procedural controls.	State whether procedural controls were included. If used, state the procedure and if the procedural controls were acquired at the same settings and during the same experiment as stained samples.	Procedural control (wild type MLV not expressing GFP) for non-specific staining was analyzed.
3.7 Serial dilutions.	State whether serial dilutions were performed on samples and note the dilution range and manner of testing. The fluorescence and/or scatter signal intensity would ideally be reported in standard units (see Section 4.3, 4.4) but arbitrary units can also be used. This data is best reported by plotting the recorded number events/concentration over a set period of time at different sample dilution. T…	This was evaluated in in Basic Protocol 1 and plotted in figure 3.
3.8. Detergent treated EV-samples	State whether samples were detergent treated to assess lability. If utilized, state what detergent was used, the end concentration of the detergent, and what the results were of the lysis.	No detergent control were used as EVs were not evaluated.
4.1 Trigger Channel(s) and Threshold(s).	The trigger channel(s) and threshold(s) used for event detection. Preferably, the fluorescence calibration (Section 4.3) and/or scatter calibration (Section 4.4) should be used in order to report the trigger channel(s) and threshold(s) in standardized units.	Trigger Channel(s) and Threshold(s) in calibrated and arbitrary units are summarized for each samplein the table on the 'Sample Acq Sheet'.
4.2 Flow Rate / Volumetric quantification.	State if the flow rate was quantified/validated and if so, report the result and how they were obtained.	Volumetric calibrations were validated by weight using the CytExpert calibration tool.
4.3 Fluorescence Calibration.	State whether fluorescence calibration was implemented, and if so, report the materials and methods used, catalogue numbers, lot numbers, and supplied reference units for the standards. Fluorescence parameters may be reported in standardized units of MESF, ERF, or ABC beads. The type of regression used, and the resulting scatter plot of arbitrary data vs standard data for the reference particles …	Fluorescence calibration was performed on 1 parameter(s) using FCMPASS software as previously demonstrated. Details on the calibration reagents and regression can be found in the summary table on the 'Fl Cali' sheet and in FCMPASS supplementary Figure 2.
4.4 Light Scatter Calibration.	State whether and how light scatter calibration was implemented. Light scatter parameters may be reported in standardized units of nm2, along with information required to reproduce the model.	Light scatter calibration was performed using FCMPASS software as previously demonstrated. Details on the reagents and modelling parameters can be found in the summary table on the 'SSC Cali' sheet and in FCMPASS supplementary Figure 1.
5.1 EV diameter/surface area/volume approximation.	State whether and how EV diameter, surface area, and/or volume has been calculated using FC measurements.	Diameter approximation using light scattering was performed using FCMPASS software as previously demonstrated. Details of modelling parameters for calibration, core-shell, and solid sphere models can be found in the 'SSC Cali' sheet and in FCMPASS supplementary figure 1.
5.2 EV refractive index approximation.	State whether the EV refractive index has been approximated and how this was done.	MLV RI was previously estimated to be at 1.45 (Ma et al., 2016) and used for the diameter size approximation.
5.3 EV epitope number approximation.	State whether EV epitope number has been approximated, and if so, how it was approximated.	Fluorescence data was reported in PE MESF however epitope number was not approximated.
6.1 Completion of MIFlowCyt checklist.	Complete MIFlowCyt checklist criteria 1 to 4 using the MIFlowCyt guidelines. Template found at www.evflowcytometry.org.	Yes
6.2 Calibrated channel detection range	If fluorescence or scatter calibration has been carried out, authors should state whether the upper and lower limits of a calibrated detection channel were calculated in standardized units. This can be done by converting the arbitrary unit scale to a calibrated scaled, as discussed in Section 4.3 and 4.4, and providing the highest unit on this scale and the lowest detectable unit above the unstai…
6.3 EV number/concentration.	State whether EV number/concentration has been reported. If calculated, it is preferable to report EV number/concentration in a standardized manner, stating the number/concentration between a set detection range.	As outlined by the gate ( 100-130 nm), viral particle concentration were evaluated with serial dilutions shown in Figure 3.
6.4 EV brightness.	When applicable, state the method by which the brightness of EVs is reported in standardized units of scatter and/or fluorescence.	Brightness was reported in units of PE MESF as explained in Basic protocol 2 and 4.
7.1. Sharing of data to a public repository.	Provide a link to the experimental data in a public data repository.	Data can be made available upon publication or request.
References
Welsh, J.A., Horak, P., Wilkinson, J.S., Ford, V.J., Jones, J.C., Smith, D., Holloway, J.A. and Englyst, N.A. (2019), FCMPASS Software Aids Extracellular Vesicle Light Scatter Standardization. Cytometry. doi:10.1002/cyto.a.23782
Welsh, J. A., & Jones, J. C. (2020). Small particle fluorescence and light scatter calibration using FCMPASS software. Current Protocols in Cytometry, 94, e79. doi: 10.1002/cpcy.79

## Sheet: Sample Acq Info
The following extrapolations of thresholds to standard units assume that samples were acquired at the same detector settings as their calibration controls.
If applied, calibration metadata for fluorescence and light scattering calibration can be found in the 'Fl Cali' and 'SSC Cali' sheets, respectively.
Filename	Sample Type	Trigger Parameter	Trigger ID	Trigger Threshold (au)	Detector Setting (au)	Trigger Threshold | Polystyrene (nm)	Trigger Threshold | Silica (nm)	Trigger Threshold | MLV Diameter (nm)	Trigger Threshold | EV Diameter (nm) [High RI]	Trigger Threshold | EV Diameter (nm) [Average RI]	Trigger Threshold | EV Diameter (nm) [Low RI]	Trigger Threshold | Scattering CS (nm^2)
All FCS files used in this protocol ( samples and reference beads)	Sample	VSSC	FL5-H	1500	195	59.1	80.3	82	97.5	109.8	141.6	4.4

## Sheet: Fl Cali
FCMPASS software version	3.1
Fluorescence Calibration
Parameter	New Parameter Name	Reference Fluor	Reference Value 1	Reference Value 2	Reference Value 3	Reference Value 4	Acquired Value 1	Acquired Value 2	Acquired Value 3	Acquired Value 4	F/P Ratio	Slope	Interecept	R-Square	Regression Type	Manufacturer	Cat. No.	Lot No.
FL7-A | PE-A	PE MESF	PE	474	5359	23843	62336	36963	454000	1950000	5080000	1	1.00833	1.87852	0.999817	log	BD Bioscence	340495	47973

## Sheet: SSC Cali
FCMPASS software version	3.1
Flow Cytometer Modelling Settings
SSC Parameter	Wavelength	Sheath RI	Determine HA	Aperture Geom	Theta	Phi	Eps	Cali. Factor (nm^2)
FL5-H | VSSC-H	405	1.34309	on	circle	90	90	54.1	0.00317368
Light scatter calibration reference beads
Diameter (nm)	Diameter CV (%)	Measured RI	Measurement Wavelength	Composition	Acquired Stat	Acquired CV	Acquisition Wavelength	Modelled RI	Manufacturer	Catalogue No.	Lot No.
81	11.7	1.59	589	Polystyrene	7772		405	1.62527	ThermoFisher Scientific	3080A	228748
100	7.8	1.59	589	Polystyrene	26661		405	1.62527	ThermoFisher Scientific	3100A	204935
152	3.3	1.59	589	Polystyrene	172870		405	1.62527	ThermoFisher Scientific	3150A	202026
203	2.6	1.59	589	Polystyrene	478000		405	1.62527	ThermoFisher Scientific	3200A	205131
269	1.6	1.59	589	Polystyrene	1080000		405	1.62527	ThermoFisher Scientific	3269	202729
303	1.6	1.59	589	Polystyrene	1380000		405	1.62527	ThermoFisher Scientific	3300A	204665
345	1.9	1.59	589	Polystyrene	1630000		405	1.62527	ThermoFisher Scientific	3350A	199283
401	1.3	1.59	589	Polystyrene	1810000		405	1.62527	ThermoFisher Scientific	3400A	203859
453	1.7	1.59	589	Polystyrene	2180000		405	1.62527	ThermoFisher Scientific	3450A	204047
508	1.7	1.59	589	Polystyrene	2990000		405	1.62527	ThermoFisher Scientific	3500A	204667
480	4.2	1.45	589	Silica	309038		405	1.4611	ThermoFisher Scientific	8050	203277
730	4.1	1.45	589	Silica	1220000		405	1.4611	ThermoFisher Scientific	8070	207434
Core-Shell Modelling Settings
Shell RI	Core RI	Shell Thickness (nm)	Parameter Name
1.47372	1.39406	5	EV Diameter (nm) [High RI]
1.47372	1.37415	5	EV Diameter (nm) [Average RI]
1.47372	1.35423	5	EV Diameter (nm) [Low RI]
Solid Sphere Modelling Settings
RI	Parameter Name
1.4546	MLV Diameter (nm)
References
Welsh, J.A., Horak, P., Wilkinson, J.S., Ford, V.J., Jones, J.C., Smith, D., Holloway, J.A. and Englyst, N.A. (2019), FCMPASS Software Aids Extracellular Vesicle Light Scatter Standardization. Cytometry. doi:10.1002/cyto.a.23782
Welsh, J. A., & Jones, J. C. (2020). Small particle fluorescence and light scatter calibration using FCMPASS software. Current Protocols in Cytometry, 94, e79. doi: 10.1002/cpcy.79
